# Supplementary material for: Sn2+doping-induced large extra vibrational energy of an excited state for efficient blue emission in Cs2SnCl6:Bi
Source: Royal Society of Chemistry journal article supplement (doi:10.1039/d3ma00107e), 2023-01-01
Supplement: d3ma00107e1.pdf [file d3ma00107e1.pdf]

## Supplementary Information

### **Sn<sup>2+</sup> doping-induced large extra vibrational energy of excited state for efficient blue emission in Cs<sub>2</sub>SnCl<sub>6</sub>: Bi**

Shaofan Fang,<sup>‡\*ab</sup> Jinbo Huang,<sup>‡a</sup> Huixia Li,<sup>b</sup> Jingheng Nie,<sup>a</sup> Zexiang Liu,<sup>a</sup> Feier Fang,<sup>a</sup> Haizhe  
Zhong,<sup>\*a</sup>

<sup>a</sup>Institute of Microscale Optoelectronics, Shenzhen University, Shenzhen 518060, P. R. China

<sup>b</sup>Shandong Laboratory of Yantai Advanced Materials and Green Manufacturing, Yantai 264003, P.  
R. China

<sup>‡</sup>These authors contributed equally.

\*Corresponding author. E-mail address: haizhe.zhong@szu.edu.cn; sffang@amgm.ac.cn

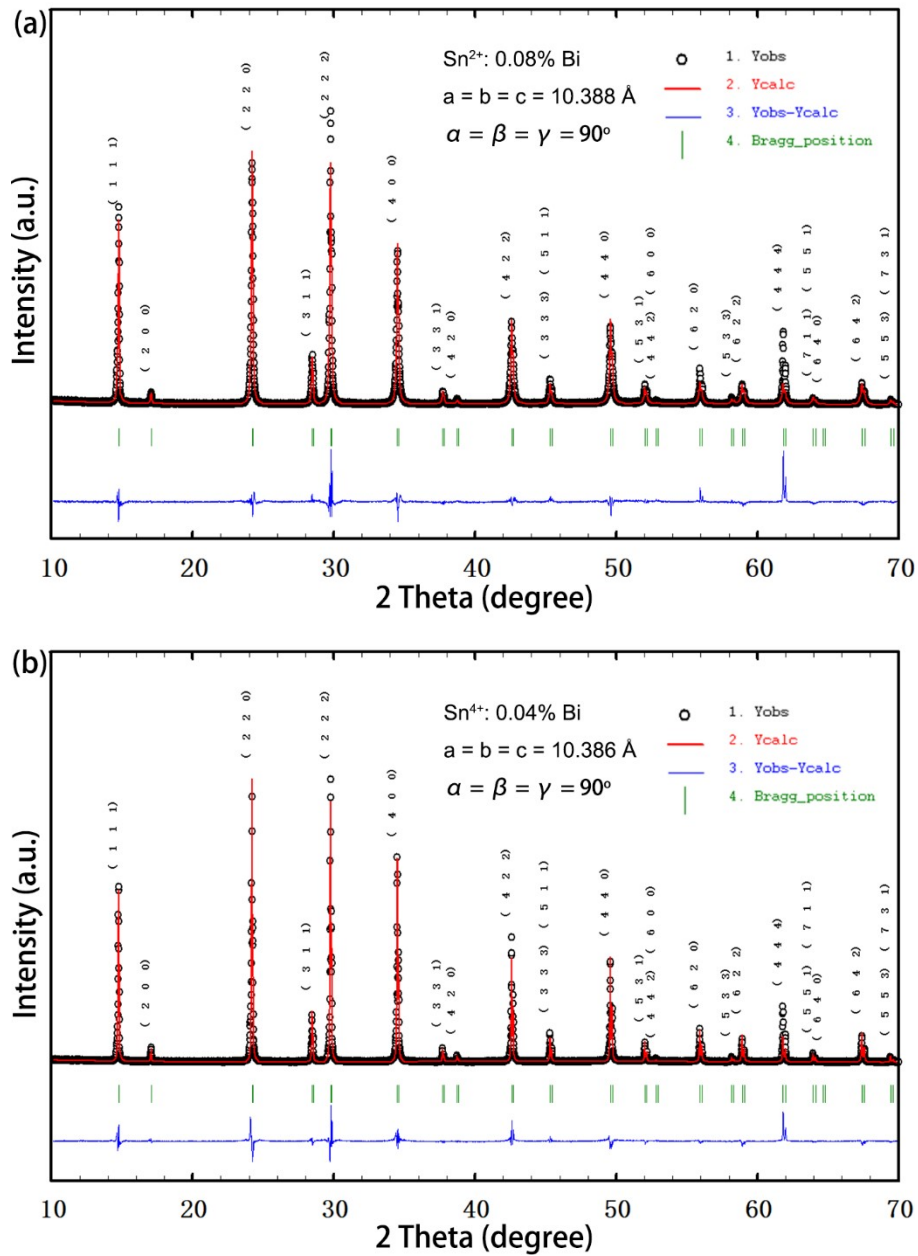

Figure S1. The XRD Rietveld refinement of  $\text{Sn}^{2+}$ : 0.08% Bi and  $\text{Sn}^{4+}$ : 0.04% Bi.

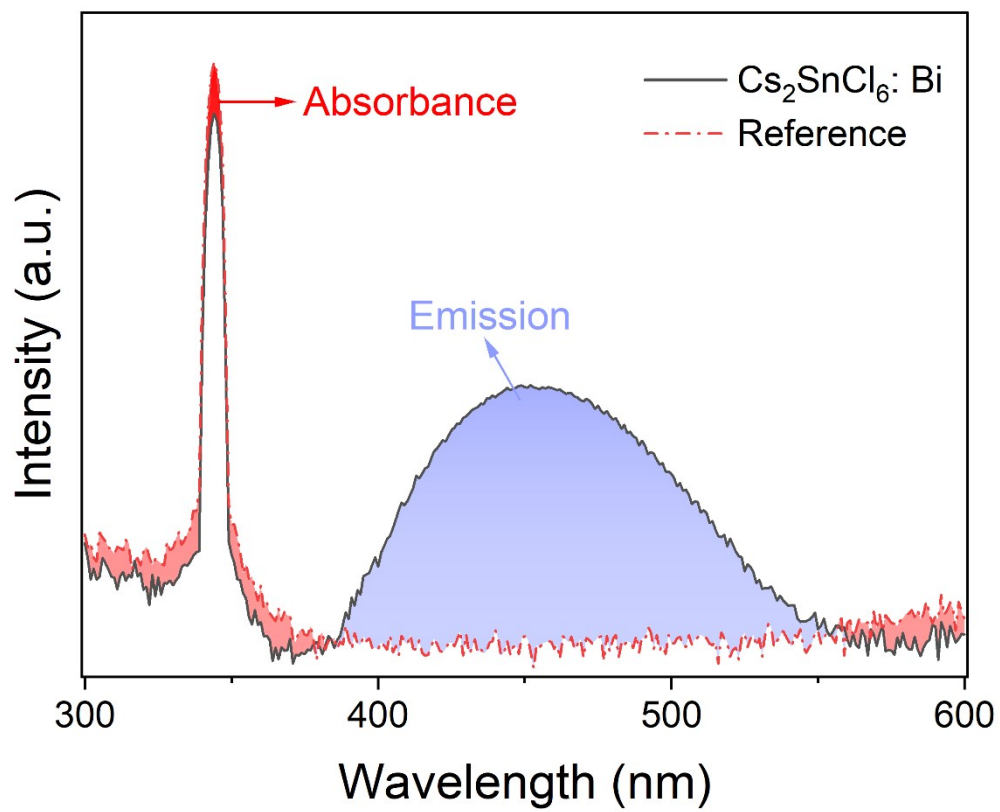

Figure S2. PL spectra for PLQY of  $\text{Cs}_2\text{SnCl}_6:\text{Bi}$  at room temperature.

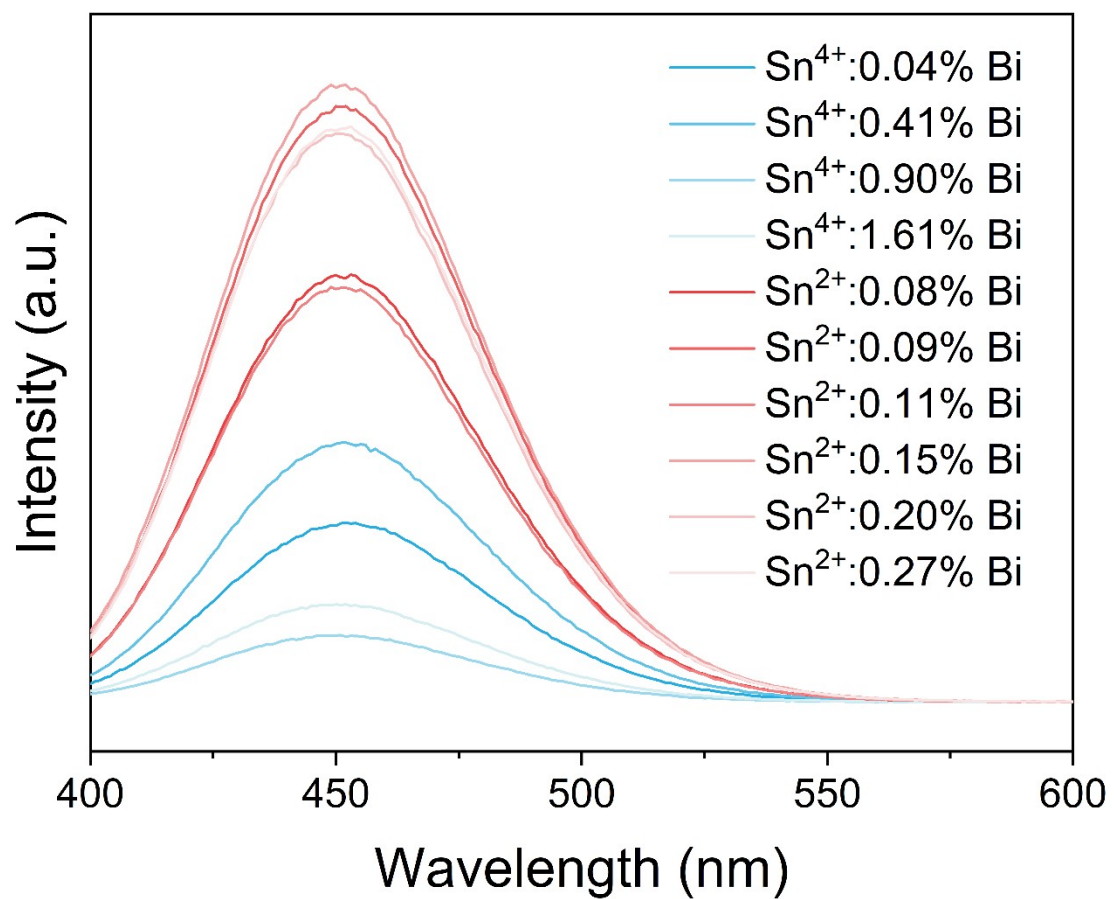

Figure S3. PL spectra of the  $\text{Cs}_2\text{SnCl}_6:\text{Bi}$  samples synthesized by  $\text{SnCl}_2$  or  $\text{SnCl}_4$  precursor.

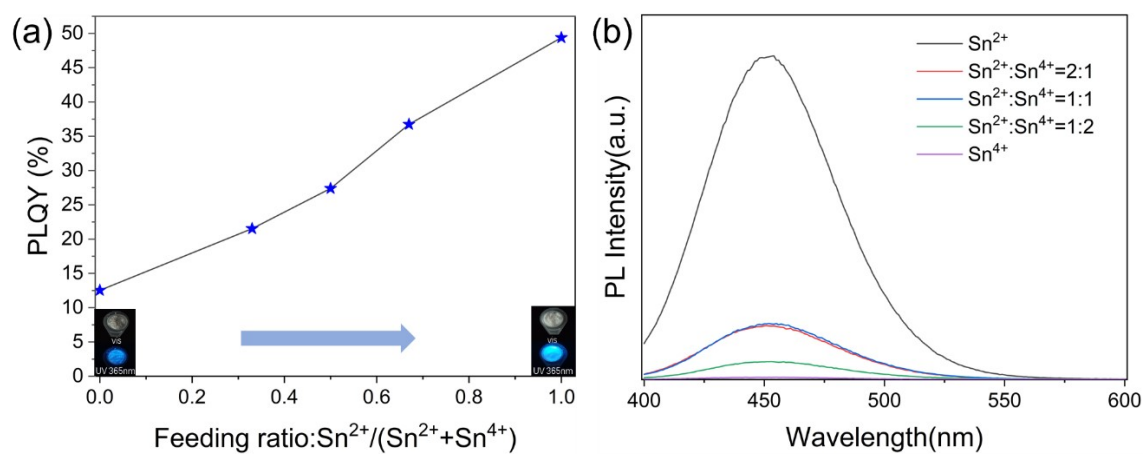

Figure S4. (a) PLQY and (b) PL spectra of the samples synthesized by different ratio of Sn<sup>2+</sup> and Sn<sup>4+</sup> in precursor solutions.

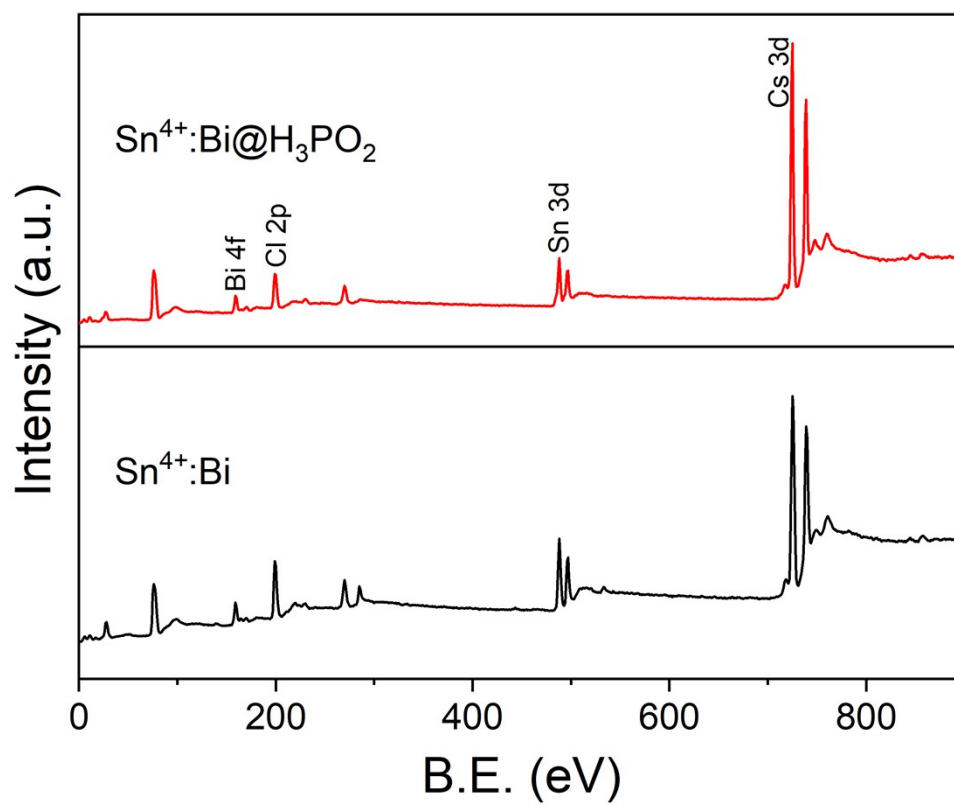

Figure S5. Full-scan XPS spectra of  $\text{Sn}^{4+}:\text{Bi}@\text{H}_3\text{PO}_2$  and  $\text{Sn}^{4+}:\text{Bi}$ .

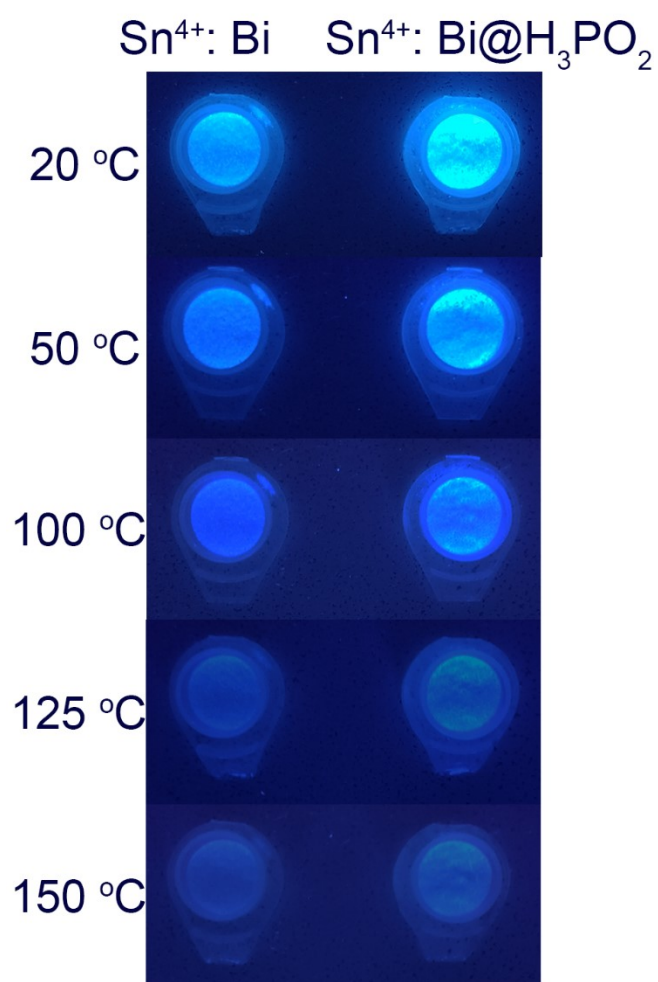

Figure S6. PL intensity of Sn<sup>4+</sup>: Bi and Sn<sup>4+</sup>: Bi@H<sub>3</sub>PO<sub>2</sub> at different temperatures under UV light.

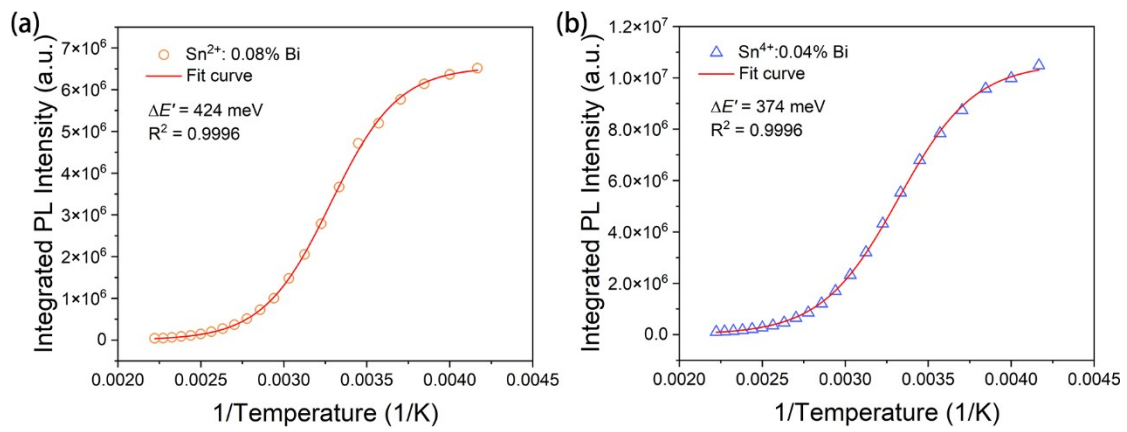

Figure S7. Integrated PL intensity as a function of temperature of (a) Sn<sup>2+</sup>: 0.08% Bi and (b) Sn<sup>4+</sup>: 0.04% Bi.
